# Supplementary material for: Multiple Peptidoglycan Modification Networks Modulate Helicobacter pylori's Cell Shape, Motility, and Colonization Potential
Source: PubMed Central journal article supplement (PMC3310797; doi:10.1371/journal.ppat.1002603), 2012-03-22
Supplement: ppat.1002603.s001.pdf [file ppat.1002603.s001.pdf]

## Supplemental Materials and Methods

**Genetic manipulations.** PCR SOEing [1] was used to create knockout alleles as described [2]. The *csd4* point mutant was generated by amplifying *csd4* with flanking primers containing XhoI and EcoRI restriction sequences and cloning the gene into a Bluescript vector (pBluescript II SK+, Invitrogen). This plasmid, pLKS2, served as the template for PCR-based site-directed mutagenesis using a QuikChange Site-Directed Mutagenesis kit (Stratagene). The presence of only the desired *csd4* point mutation (A665C) in the resulting plasmid, pLKS12, was confirmed by sequencing. Complementation at the *rdxA* locus was achieved by inserting the deleted gene into pLC292, a plasmid containing *rdxA* flanking sequences [3]. pLKS24 was generated by inserting a PCR product containing *csd4* flanked by XbaI and XhoI restriction sequences into pLC292. pLKS27 was constructed by subcloning the XbaI-SpeI fragment containing *csd5* from pLKS23, a TOPO vector containing *csd5*, into pLC292.

The first 20 amino acids of Csd4 are predicted to encode an N-terminal transmembrane domain. In order to create a Csd4 *E. coli* expression vector, we decided to clone only the portion downstream of the transmembrane domain (aa 21-438). The *csd4* gene (bp 61 through 140 bp downstream of the stop codon) was amplified by PCR using primers containing a 5' NcoI site and a 3' XhoI site. The primers were designed based on the sequence of HP1075, the *csd4* gene in *H. pylori* 26695, as the G27 sequence was not available at the time this plasmid was made. Two sequence differences relative to the G27 sequence were introduced by the forward primer: a63g, a silent mutation, and c65g, resulting in a T22M mutation with respect to the G27 amino acid sequence. The PCR product was cloned into the NcoI and XhoI sites of pET15-HE (generously provided by Barry Stoddard, FHCRRC), resulting in pLKS1. This plasmid allows expression of N-terminally truncated Csd4 with an N-terminal His•Tag behind a thrombin cleavage site.

Plasmids were prepared using Qiagen kits and *H. pylori* genomic DNA isolated using the Wizard Genomic DNA kit (Promega). All restriction enzymes and high-fidelity polymerases used for PCR SOEing were obtained from New England Biolabs or Invitrogen. Sequencing was performed by the FHCRRC Genomics Shared Resource and sequences analyzed using Sequencher (Gene Codes).

PCR products and plasmids were introduced into the chromosome using natural transformation as described [4] and the presence of the correct allele affirmed by PCR. Clones

were additionally checked for urease activity, flagella-based motility and the absence of undesired point mutations in the coding sequences. Single clones were used for phenotypic characterization and infection experiments. Selectable alleles were transferred between *H. pylori* strains by transforming genomic DNA using the same procedures.

**Csd4 purification.** BL21(DE3) cells carrying pLKS1 (encoding amino acids 21-438 of Csd4 with an N-terminal His•Tag) were grown with shaking in LB supplemented with 100 µg/mL ampicillin to mid-log phase ( $A_{600}$  0.4-0.6). Cultures were cooled on ice for 15 minutes, induced with 1 mM IPTG, and grown overnight (16-20 hr) at 15°C with shaking. Cells were harvested by centrifugation, resuspended in 0.01 volumes cell lysis buffer (50 mM sodium phosphate pH 8, 500 mM NaCl, 10% glycerol, 10 mM MgCl<sub>2</sub>, 1× Complete EDTA-free Protease Inhibitor Cocktail (Roche)), and stored at -20°C. Cells were thawed and then lysed by three additional freeze-thaw cycles (dry ice/methanol bath), followed by three sonication cycles at 10% power (10 sec total, 1 sec on/1 sec off) (Fisher Scientific Sonic Dismembrator Model 500). Cell debris was removed by centrifugation (10,000×g, 10 min).

Ni-NTA agarose (Invitrogen) was prepared by rinsing once with 5 volumes of water and then twice with 5 volumes of binding buffer (50 mM sodium phosphate pH 8, 500 mM NaCl, 10% glycerol, 10 mM MgCl<sub>2</sub>). Binding was performed in batch by adding 5 volumes of cell lysate to prepared Ni-NTA agarose at 4°C for 1 hr with gentle mixing. This mixture was poured into a column and washed four times with 10 volumes of wash buffer (binding buffer plus 20 mM imidazole). Csd4 was eluted with 10 volumes of elution buffer (binding buffer plus 250 mM imidazole). Elution fractions containing approximately 95% pure Csd4 (as judged visually by Coomassie staining of SDS-PAGE) at reasonably high concentration (>0.5 mg/mL by Bradford assay) were pooled. The glycerol concentration of the pool was increased to 20% prior to storage at -20°C.

**Statistical analysis of cell shape distributions.** Kolmogorov–Smirnov (KS) statistics were calculated to assay the differences between the double mutant and single mutant (or wild-type) distributions of side curvature generated by CellTool. In order to determine a biologically-plausible null distribution for the range of KS statistics expected to be observed by chance due to biological variability, a bootstrapped distribution of KS values was calculated for the wild-type

and single-mutant strains as follows: the side-curvature values from each strain were resampled (with replacement) into two separate samples  $10^5$  times and the KS statistic computed for each pair of samples. For each comparison of a double mutant to a single mutant (or wild-type), the measured KS distance between the two distributions was compared to the null distribution calculated for the single mutant (or wild-type), generating a one-tailed p-value. As the distributions of side-curvature values are quite different for the different strains, it was most appropriate to calculate separate null distributions for each single mutant strain.

**Bioinformatic analyses.** Csd4/5 homologues were identified by performing a BLASTP search of the NCBI non-redundant protein sequences database using HPG27 Csd4 and Csd5 as queries. Hits with a maximum *E*-value of 0.001 were considered potential homologues, but we focused subsequent analyses on hits aligning across at least 75% of the query sequence and showing >50% similarity (determined by MatGAT 3.0 [5]). All of these homologues had BLASTP *E*-values  $< 1E^{-40}$ . Altogether our Csd4 BLAST search yielded 108 hits with *E*-values  $< 0.001$ , 87 of which met our 50% similarity cut-off. Our Csd5 BLAST search yielded 39 hits with *E*-values  $< 0.001$ , 29 of which met our 50% similarity cut-off.

To generate the phylogenetic trees in Figure S1 we included only species/strains for which the genome was listed as “complete” by NCBI. We retained all 10 complete *H. pylori* genomes, but chose only one representative strain for the 24 other species/subspecies with Csd4 homologues. Dataset compilation and editing, multisequence alignment (through a built-in Clustal W algorithm), and construction of neighbor-joining trees were all accomplished using MEGA 5.05 [6].

Morphological classifications were drawn from multiple chapters of *The Prokaryotes* [7,8] and *Bergey's Manual of Systematic Bacteriology* [9,10]. We consulted additional primary research articles for the following species: *Arcobacter butzleri* [11,12], *Arcobacter nitrofigilis* [13], *Campylobacter concisus* and *Campylobacter curvus* [14], *Campylobacter hominis* [15], *Nautilia profundicola* [16], *Sulfuricurvum kujiense* [17], *Sulfurimonas dentrificans* [18], *Sulfurospirillum deleyianum* [19], and *Wolinella succinogenes* [20,21].

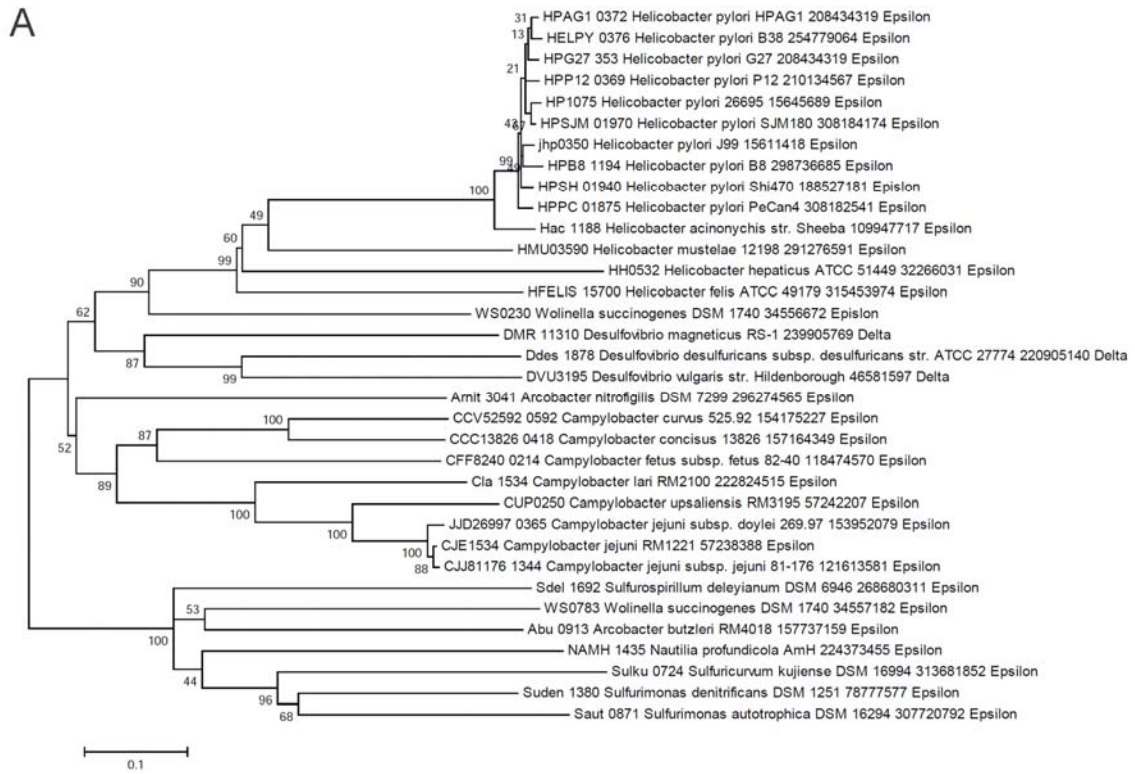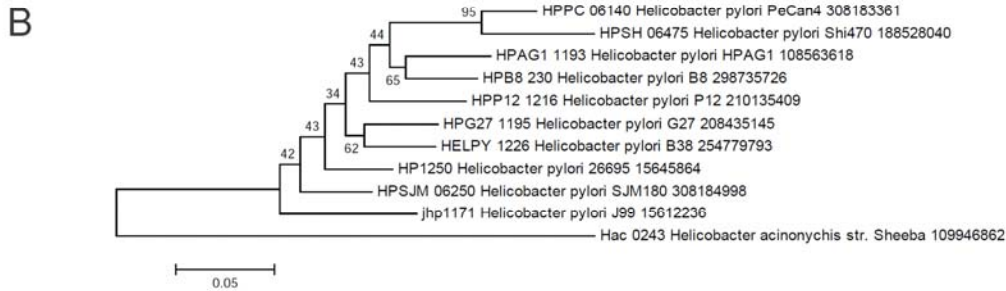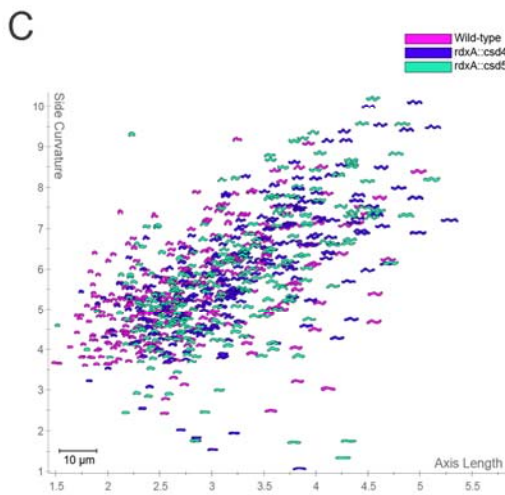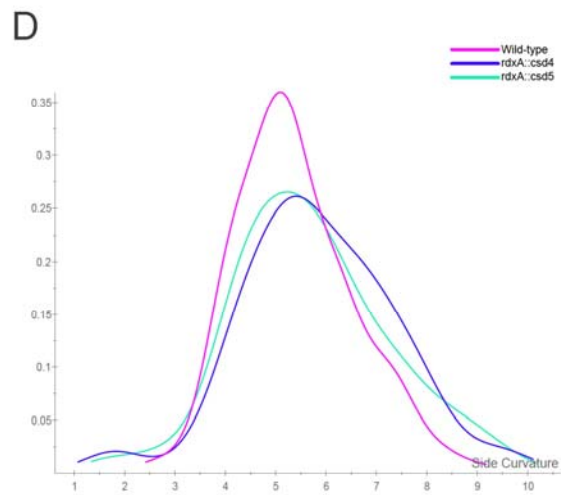

**Figure S1. Phylogenetic relatedness of Csd4 and Csd5 homologues and morphological complementation of their respective mutant strains.** A-B) Dendograms displaying Csd4 (A) and Csd5 (B) homologues that show at least 50% similarity over 75% or more of the query sequence (BLASTP  $E$ -values  $< 1E^{-40}$ ). Sequence labels list the locus tag, species and strain name, GI number, and the Proteobacterial subdivision. Branches are labeled with bootstrapping values formulated from 1000 iterations. Homologues from all 10 complete *H. pylori* genomes are included in the analyses and cluster together. One representative strain is shown for the other 24 species/subspecies encoding Csd4 homologues. *Wolinella succinogens* is the only species that appears to encode two Csd4 homologues, but they do not cluster together suggesting they arose from an early duplication event and subsequently diverged, or that one was acquired by horizontal gene transfer. All of the species and strains shown have curved or helical rod morphology (references listed in Supporting Information Supplemental Materials and Methods) and all Csd4 homologues have conserved the catalytic glutamate that we demonstrate is required for Csd4's shape-determining function. C) Scatter plot arraying wild-type and complemented strains by length (x-axis,  $\mu\text{m}$ ) and cell curvature (y-axis, arbitrary units). CellTool software was used to capture the polygonal outlines of 200-300 cells/strain from  $1000\times$  phase contrast images and algorithmically determine each cell's length along its two-dimensional central axis, as well as the degree of cell body curvature (excluding the poles) [2]. D) Smooth histogram displaying kernel density estimates of the distribution of each strain's cell curvature (x-axis). Strains used: NSH57, LSH38, LSH104.

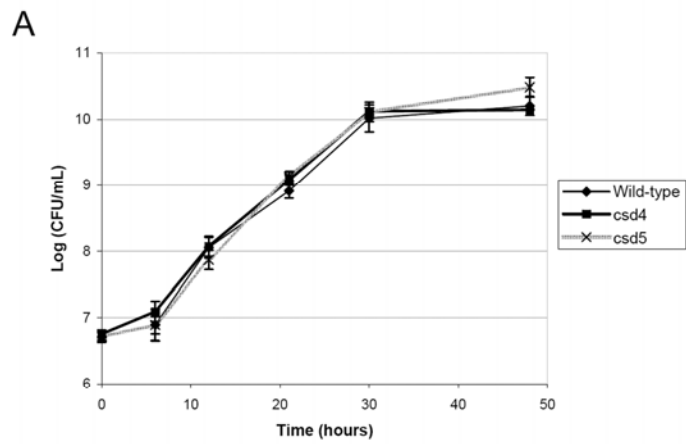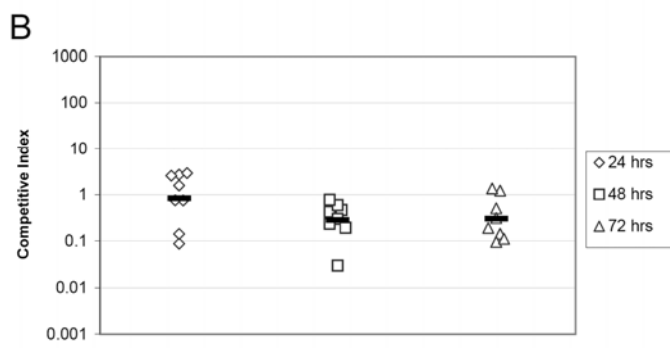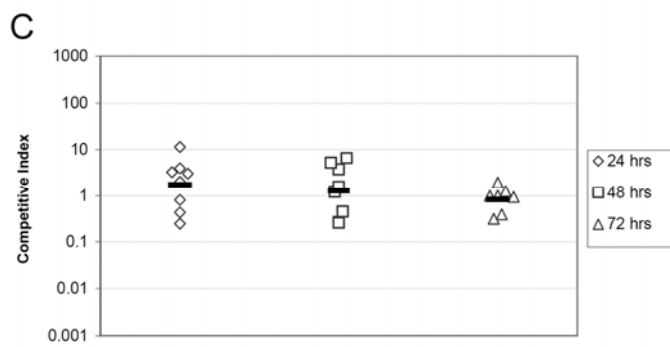

**Figure S2. Growth of wild-type, *csd4*, and *csd5* mutant strains independently and in co-culture.** A) Growth in liquid culture through log phase and into stationary phase. Data are compiled from two independent experiments with four replicate cultures per strain in each experiment. Data points show the mean  $\pm$  SD. B,C) Results of 72 hr experiments co-culturing *csd4* (B) and *csd5* (C) mutants with wild-type. Cultures were maintained in log phase throughout the experiment by diluting every 24 hrs. Data encompass two independent experiments with four replicate cultures each, yielding a total of eight cultures (data points) for each strain pair. Data are plotted as a competitive index:  $[\text{CFU}/\text{mL}_{\text{MUT}}:\text{CFU}/\text{mL}_{\text{WT}}$  at time 24, 48, or 72 hrs]/ $[\text{CFU}/\text{mL}_{\text{MUT}}:\text{CFU}/\text{mL}_{\text{WT}}$  at time 0]. Black bars indicate the geometric mean. Strains used: NSH57, LSH18, LSH36.

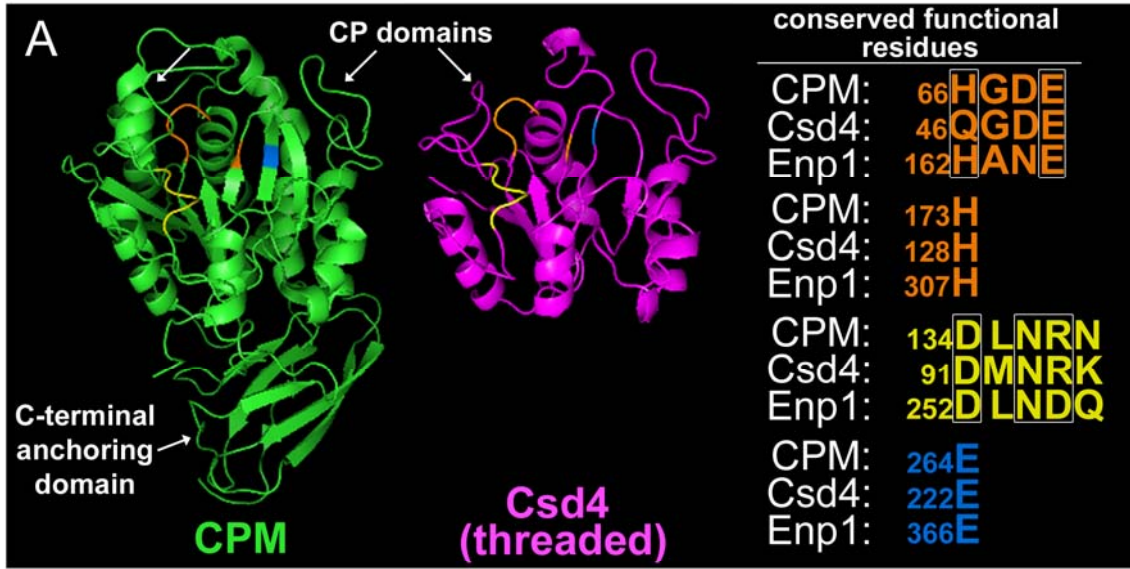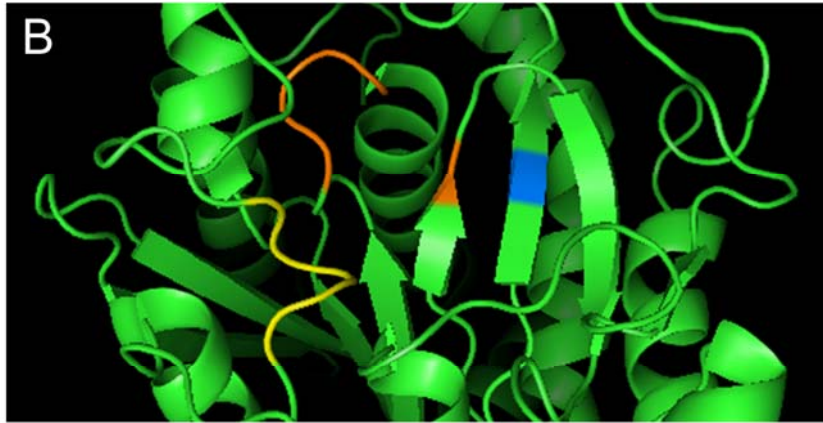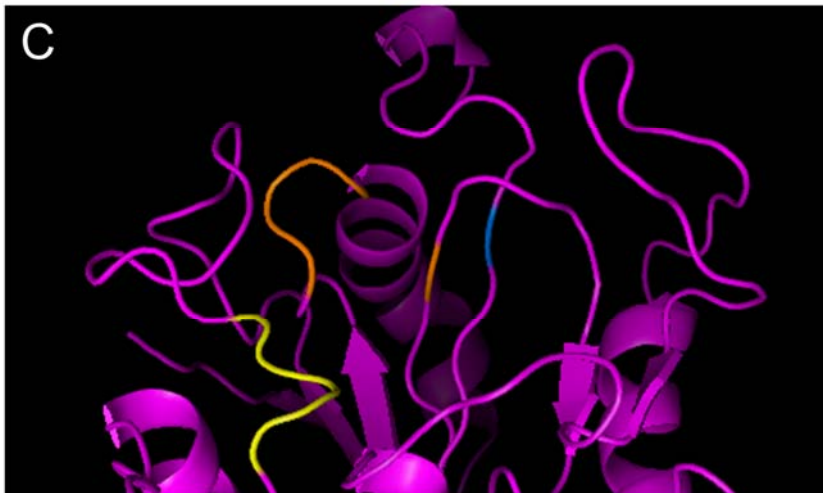



**Figure S3. Prediction of Csd4 functional residues through structural threading analysis.** A) Human carboxypeptidase M crystal structure (CPM, green) alongside the partial threaded structure of Csd4 (purple) [22,23]. Csd4 threaded onto the catalytic carboxypeptidase (CP) domain of CPM, but lacks the C-terminal anchoring domain. The position of four residues/motifs involved in zinc binding (orange), carboxylate binding (yellow), and catalysis (blue) were identified on the CPM crystal structure and corresponding residues positionally identified on the Csd4 threaded structure. The identities of each residue/motif are listed to the right for CPM, Csd4, and *B. sphaericus* endopeptidase I (Enp1) [24]. Within each motif, the highly conserved residues are boxed in white. B-C) Enlarged view of the functionally important residues in CPM (B) and Csd4 (C), with the catalytic glutamate targeted by site-directed mutagenesis indicated in blue.

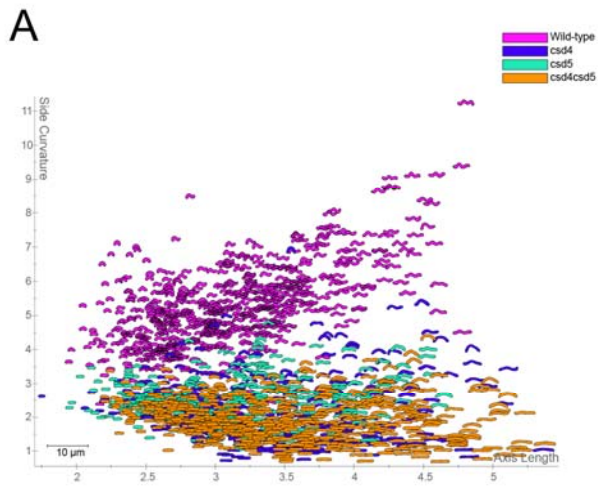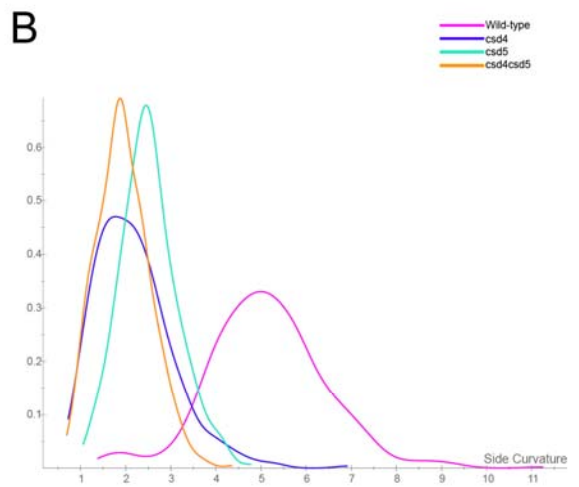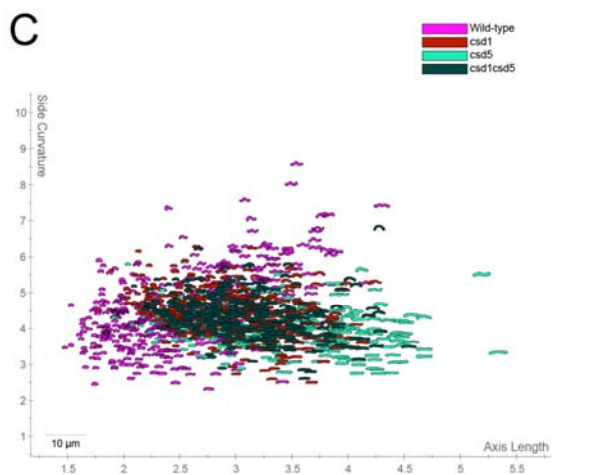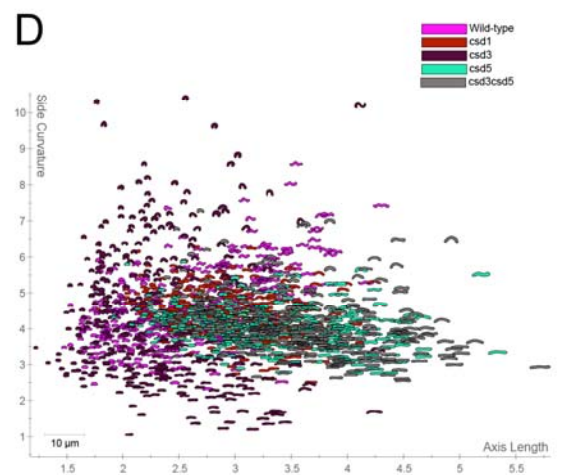

**Figure S4. Morphological characterization of cross-shape class and straight rod double mutants.** A, C-D) Scatter plots arraying wild-type and mutant populations by cell length (x-axis,  $\mu\text{m}$ ) and cell curvature (y-axis, arbitrary units). B) Smooth histograms displaying population cell curvature (x-axis) as a density function (y-axis). Bootstrapped Komolgorov–Smirnov (KS) statistics of population cell curvature distributions: A) *csd4csd5* vs. *csd4*  $p=0.01$ , *csd4csd5* vs. *csd5*  $p<0.00001$ ; C) *csd1csd5* vs. *csd1*  $p=0.25$ , *csd1csd5* vs. *csd5*  $p<0.00001$ ; D) *csd3csd5* vs. *csd5*  $p=0.37$ , *csd3csd5* vs. *csd3*  $p<0.00001$ , *csd3csd5* vs. *csd1*  $p<0.00001$ . All mutant comparisons to wild-type had  $p<0.00001$ . Strains used: LSH100, LSH122, LSH123, LSH134, MLH3, MLH4, NSH152a, NSH161, TSH36.

**Figure S5. Video depicting motile helical wild-type and straight rod *csd4* mutant *H. pylori* in broth media.** Five second video with a frame rate of 0.1 seconds taken at 600x. The *csd4* mutant is on the left, wild-type on the right. Note that although cell morphology differences are not readily apparent at this magnification, both strains exhibit similar motility.

**Figure S6. Video depicting motile helical wild-type and straight rod *csd4* mutant *H. pylori* in 0.5% methylcellulose.** Five second video with a frame rate of 0.1 seconds taken at 600x. The *csd4* mutant is on the left, wild-type on the right. Note that although cell morphology differences are not readily apparent at this magnification, both strains exhibit similar motility.

**Table S1 Muropeptide composition of Csd4 treated  $\Delta$ csd4 mutant sacculi**

| Peak No. | Muropeptide      | % Area <sup>a</sup> |             |                          |
|----------|------------------|---------------------|-------------|--------------------------|
|          |                  | Buffer              | +Csd4, EDTA | +Csd4, ZnCl <sub>2</sub> |
| 1        | Tri              | 16.52               | 16.68       | 0.20                     |
| 2        | Tetra            | 1.51                | 1.98        | 1.69                     |
| 3        | Penta(Gly5)      | 3.96                | 4.07        | 4.01                     |
| 4        | Di               | 0.00                | 0.00        | 13.29                    |
| 5        | Penta            | 30.83               | 31.45       | 31.40                    |
| 6        | TetraTri         | 7.57                | 6.96        | 7.40                     |
| 7        | TetraPenta(Gly5) | 1.76                | 1.74        | 2.01                     |
| 8        | TetraTetra       | 3.80                | 3.66        | 3.81                     |
| 9        | TetraPenta       | 9.81                | 10.73       | 9.87                     |
| 10       | PentaAnh         | 1.45                | 1.23        | 0.82                     |
| 11       | TetraTriAnh I    | 3.17                | 2.40        | 3.19                     |
| 12       | TetraTriAnh II   | 2.61                | 2.06        | 2.61                     |
| 13       | TetraTetraAnh I  | 2.48                | 1.87        | 2.46                     |
| 14       | TetraTetraAnh II | 1.01                | 0.45        | 0.95                     |
| 15       | TetraPentaAnh    | 6.83                | 5.53        | 6.82                     |
| 1 - 15   | all known        | 93.31               | 90.81       | 90.53                    |

<sup>a</sup>Percentages calculated as per [25].

**Table S2 Muropeptide composition of wild-type, mutant, and complemented mutant strains**

| Peak No. | Muropeptide      | WT (Avg ± SD) <sup>b</sup> | %Area <sup>a</sup>  |                      |        |                       |           |        |           |        |           |       |          |       |
|----------|------------------|----------------------------|---------------------|----------------------|--------|-----------------------|-----------|--------|-----------|--------|-----------|-------|----------|-------|
|          |                  |                            | LSH 13 <sup>b</sup> | LSH 112 <sup>b</sup> | LSH 18 | LSH 28                | LSH 105   | LSH 36 | LSH 104   | TSH 36 | LSH28 -13 | KGH 6 | NSH 153b | MLH 3 |
|          |                  |                            | csd1                | csd3                 | csd4   | csd4 <sup>E222A</sup> | csd4 cmpl | csd5   | csd5 cmpl | csd4   | csd1      | csd1  | csd3     | csd3  |
| 1        | Tri              | 3.98 ± 0.34                | 4.57                | 3.35                 | 17.29  | 16.05                 | 3.38      | 4.46   | 4.33      | 1.14   | 11.8      | 3.12  | 10.74    | 3.22  |
| 2        | Tetra            | 9.59 ± 0.49                | 7.11                | 6.31                 | 2.34   | 2.14                  | 9.28      | 8.87   | 9.70      | 1.36   | 2.17      | 6.92  | 2.94     | 6.22  |
| 3        | Penta(Gly5)      | 4.40 ± 0.37                | 5.06                | 5.65                 | 4.10   | 3.07                  | 4.46      | 5.44   | 3.92      | 3.72   | 5.2       | 5.72  | 5.77     | 6.37  |
| 4        | Di               | 2.52 ± 0.36                | 1.65                | 2.14                 | 0.00   | 0.00                  | 2.15      | 2.79   | 2.46      | 0      | 0.36      | 1.79  | 0.00     | 2.2   |
| 5        | Penta            | 33.33 ± 1.42               | 33.01               | 31.61                | 35.08  | 36.31                 | 32.85     | 35.76  | 32.21     | 32.01  | 30.1      | 30.16 | 33.39    | 30.63 |
| 6        | TetraTri         | 2.44 ± 0.24                | 2.7                 | 1.97                 | 8.40   | 8.61                  | 2.25      | 2.90   | 2.64      | 7.88   | 5.09      | 1.94  | 4.20     | 1.76  |
| 7        | TetraPenta(Gly5) | 2.07 ± 0.21                | 2.93                | 3.3                  | 1.73   | 1.40                  | 2.24      | 2.43   | 1.79      | 2.11   | 3.14      | 3.65  | 3.03     | 3.66  |
| 8        | TetraTetra       | 7.72 ± 0.59                | 8.27                | 5.05                 | 4.54   | 4.43                  | 8.15      | 8.03   | 7.88      | 3.38   | 5.31      | 7.33  | 2.69     | 4.54  |
| 9        | TetraPenta       | 11.20 ± 1.15               | 16.61               | 16.85                | 11.48  | 12.34                 | 12.02     | 12.70  | 11.06     | 10.03  | 13.79     | 14.52 | 14.57    | 16.37 |
| 10       | PentaAnh         | 1.69 ± 0.13                | 1.43                | 1.48                 | 2.10   | 2.39                  | 1.83      | 1.96   | 1.68      | 1.35   | 1.5       | 1.68  | 1.99     | 1.55  |
| 11       | TetraTriAnh I    | 1.23 ± 0.12                | 0.89                | 0.7                  | 2.78   | 2.94                  | 1.09      | 1.11   | 1.23      | 3.78   | 2.35      | 1.12  | 1.71     | 0.7   |
| 12       | TetraTriAnh II   | 0.69 ± 0.08                | 0.24                | 0.51                 | 1.64   | 1.65                  | 0.58      | 0.72   | 0.81      | 2.3    | 1.19      | 0.41  | 0.96     | 0.46  |
| 13       | TetraTetraAnh I  | 5.16 ± 0.59                | 4.69                | 2.95                 | 2.52   | 2.37                  | 4.06      | 4.74   | 3.92      | 3.32   | 2.69      | 5.85  | 1.90     | 1.83  |
| 14       | TetraTetraAnh II | 1.82 ± 0.24                | 1.02                | 1.17                 | 0.73   | 0.70                  | 1.64      | 1.57   | 1.90      | 0.8    | 0.87      | 1.19  | 0.68     | 1.15  |
| 15       | TetraPentaAnh    | 7.06 ± 0.29                | 6.44                | 9.15                 | 5.28   | 5.61                  | 7.13      | 6.53   | 7.38      | 7.27   | 6.88      | 7.43  | 7.47     | 8.59  |
| 1-15     | all known        | 94.92 ± 2.74               | 96.63               | 92.18                | 100    | 100                   | 93.11     | 100    | 92.91     | 96.45  | 92.44     | 92.83 | 92.04    | 89.25 |

<sup>a</sup>Percentages calculated as per [25].

<sup>b</sup>As reported in [2].

<sup>c</sup>Calculated from 6 independent samples.

**Table S3 Bacterial strains**

| Name      | Relevant Genotype or Description                               | Reference or Source |
|-----------|----------------------------------------------------------------|---------------------|
| G27       | Wild-type <i>H. pylori</i>                                     | [26]                |
| NSH57     | Wild-type <i>H. pylori</i>                                     | [27]                |
| LSH100    | Wild-type <i>H. pylori</i> , NSH57 with G27 <i>fliM</i> allele | [28]                |
| P8D1#51   | <i>csd4::tn-cat</i> in G27                                     | This study          |
| LSH13     | $\Delta csd1::catsacB$ in NSH57                                | [2]                 |
| LSH16     | $\Delta csd4::cat$ in NSH57                                    | This study          |
| LSH18     | $\Delta csd4::catsacB$ in NSH57                                | This study          |
| LSH28     | <i>csd4</i> <sup>A665C</sup> (or <i>csd4E222A</i> ) in NSH57   | This study          |
| LSH28_13  | <i>csd4E222A</i> $\Delta csd1::catsacB$ in NSH57               | This study          |
| LSH31     | $\Delta csd5::catsacB$ in NSH57                                | This study          |
| LSH36     | $\Delta csd5::catsacB$ in NSH57 (back-cross)                   | This study          |
| LSH45     | <i>rdxA::catsacB*</i> (sacB gene inactivated) in NSH57         | This study          |
| LSH80     | $\Delta csd4::cat$ <i>rdxA::csd4</i> in NSH57                  | This study          |
| LSH91     | $\Delta csd5::cat$ in NSH57                                    | This study          |
| LSH104    | $\Delta csd5::cat$ <i>rdxA::csd5</i> in NSH57                  | This study          |
| LSH105    | $\Delta csd4::cat$ <i>rdxA::csd4</i> in NSH57                  | This study          |
| LSH122    | $\Delta csd4::cat$ in LSH100                                   | This study          |
| LSH123    | $\Delta csd5::cat$ in LSH100                                   | This study          |
| LSH124    | $\Delta csd4::cat$ <i>rdxA::csd4</i> in LSH100                 | This study          |
| LSH134    | $\Delta csd1::aphA3$ in LSH100                                 | [2]                 |
| KGH2      | $\Delta csd1::aphA3$ in NSH57                                  | This study          |
| KGH6      | $\Delta csd5::cat$ $\Delta csd1::aphA3$ in NSH57               | This study          |
| MLH3      | $\Delta csd5::cat$ $\Delta csd3::aphA3$ in LSH100              | This study          |
| MLH4      | $\Delta csd5::cat$ $\Delta csd3::aphA3$ in LSH100              | This study          |
| NSH152a   | $\Delta csd3::aphA3$ in LSH100                                 | This study          |
| NSH153a   | $\Delta csd3::aphA3$ <i>csd4E222A</i> in LSH100                | This study          |
| NSH153b   | $\Delta csd3::aphA3$ <i>csd4E222A</i> in LSH100                | This study          |
| NSH160a   | $\Delta csd1::aphA3$ <i>csd4E222A</i> in LSH100                | This study          |
| NSH161    | $\Delta csd1::aphA3$ <i>csd5::cat</i> in LSH100                | This study          |
| TSH36     | $\Delta csd4::aphA3$ <i>sacB</i> <i>csd5::cat</i> in LSH100    | This study          |
| XL-1 Blue | Cloning <i>E. coli</i> strain                                  | Stratagene          |
| Top10     | Cloning <i>E. coli</i> strain                                  | Invitrogen          |
| DH10B     | Cloning <i>E. coli</i> strain                                  | Invitrogen          |
| BL21(DE3) | Protein expression <i>E. coli</i> strain                       | Invitrogen          |



**Table S4 Primers**

| <b>Name</b>                           | <b>Sequence</b>                                   |
|---------------------------------------|---------------------------------------------------|
| <i>Mapping transposon insertions</i>  |                                                   |
| N3                                    | TTTAATACGACGGGCAATTTGCACTTCAG                     |
| N2                                    | CAGTTTAAGACTTTATTGTC                              |
| S                                     | TAATCCTTAAAACTCCATTTCCACCCCT                      |
| S2                                    | AGTTCCCAACTATTTTGTCC                              |
| CEKG2A                                | GGCCACGCGTCGACTAGTACNNNNNNNNNNNAGAG               |
| CEKG2C                                | GGCCACGCGTCGACTAGTACNNNNNNNNNNNGATAT              |
| CEKG4                                 | GCCACGCGTCGACTAGTAC                               |
| <i>Generation of knockout alleles</i> |                                                   |
| HPG27_353-359u-5-XhoI                 | CCCTCGAGATGATAGAAGCTTGCAAAGCG                     |
| HPG27_353-47-C1-3                     | ATCCACTTTTCAATCTATATCAACACCCAAGAATACAAG<br>CCC    |
| HPG27_353-1279-SB2-5                  | CAAAAGAAAATGCCGATATCCAACGCGTTTAGCGGGAT<br>GATC    |
| HPG27_353-1279-C2-5                   | CCCAGTTTGTGCGCACTGATAAAACGCGTTTAGCGGGAT<br>GATC   |
| HPG27_353-356d-3-EcoRI                | TAGAATTCAACATGCATAGCTCCATCAGG                     |
| HPG27_1195-256u-5                     | TGCGATTTTATTAGTGGTGGC                             |
| HPG27_1195-63-C1-3                    | ATCCACTTTTCAATCTATATCCGCTAAAACCACCAACAA<br>AGG    |
| HPG27_1195-529-SB2-5                  | CAAAAGAAAATGCCGATATCCCACGAAACAAAGGGCTA<br>TGTG    |
| HPG27_1195-490-C2-5                   | CCCAGTTTGTGCGCACTGATAAAGCGTGAAGGTTTTAGA<br>AATCC  |
| HPG27_1195-315d-3                     | CCCTAAAGCGTCGGTATTGTA                             |
| HPG27_1481-389u-5                     | GCGAGCGCTGATGGGATTGTG                             |
| HPG27_1481-16-K2-3                    | GAATTGTTTTAGTACCTAGATGTCCGTAACCATTACAAT<br>CAAACG |
| HPG27_1481-16-C1-3                    | ATCCACTTTTCAATCTATATCGTCCGTAACCATTAC<br>AATCAAAC  |
| HPG27_1481-789-K1-5                   | CGTTTCATAGAGTTATTCTGTCCCATGAGTTTCACCA<br>AATGG    |
| HPG27_1481-789-SB2-5                  | CAAAAGAAAATGCCGATATCCCCCATGAGTTTCAC<br>CAAATGG    |
| HPG27_1481-253d-3                     | ATATTCTTAGGGCGAGTCTCCC                            |
| <i>Site-directed Mutagenesis</i>      |                                                   |
| HPG27_353-E222A-sense                 | GAGCGCTTTTGCCAATGCAGCCAGCAAAGAACTCC               |
| HPG27_353-E222A-<br>antisense         | GGAGTTCTTTGCTGGCTGCATTGGCAAAGCGCTC                |
| <i>Complementation</i>                |                                                   |
| HPG27_353-359u-5-XbaI                 | CCTCTAGAATGATAGAAGCTTGCAAAGCG                     |
| HPG27_353-128d-3-XhoI                 | ATCTCGAGGCATAGCCTCTCTGTTAAGTC                     |

---

*Expression Vector Cloning*

---

|                     |                              |
|---------------------|------------------------------|
| HPG27_353-61-5-NcoI | TCCCATGGAGATGATAGAAAAAGCCCTG |
|---------------------|------------------------------|

---

*Other Sequencing*

---

|                     |                        |
|---------------------|------------------------|
| HPG27_353-535-3     | GGGGTGCAATAAATGGGCGTT  |
| HPG27_353-422-5     | CGATGCTCAATCCTAAGCGCT  |
| HPG27_353-910-5     | ATCCCCATAGAGAGCAACGCT  |
| HPG27_353-995-3     | GTCATGAGCTTGTTGCCGTAT  |
| HPG27_353-1279-5    | AACGCGTTTAGCGGGATGATC  |
| HPG27_353-47-3      | AACACCCAAGAATACAAGCCC  |
| HPG27_1195-63-3     | CGCTAAAACCACTAATGATGG  |
| HPG27_1195-116-RT-5 | AAGACAGCGCTCCAATAAGCC  |
| HPG27_1195-270-RT-3 | TGCGGTCGTTTCTAAAGGTGGC |
| sac-1380-seq-5      | AGACAGCATCCTTGAACAAGG  |
| cat-87-seq-3        | CCTCCGTAAATTCGATTTGT   |

---

**Table S5 Plasmids**

| <b>Name</b>        | <b>Relevant Genotype</b>                        | <b>Reference or Source</b>   |
|--------------------|-------------------------------------------------|------------------------------|
| pBluescript II SK+ | Bluescript cloning vector                       | Invitrogen                   |
| pCR 2.1-TOPO       | TOPO cloning vector                             | Invitrogen                   |
| pET15-HE           | Modified pET15 expression vector                | Barry Stoddard lab,<br>FHCRC |
| pLC292             | pRdxA with ampicillin resistance marker         | [3]                          |
| pLKS1              | <i>csd46His</i> in pET15HE                      | This study                   |
| pLKS2              | <i>csd4</i> in pBluescript II SK+               | This study                   |
| pLKS12             | <i>csd4</i> <sup>A665C</sup> generated in pLKS2 | This study                   |
| pLKS23             | <i>csd5</i> in pCR 2.1-TOPO                     | This study                   |
| pLKS24             | <i>csd4</i> in pLC292                           | This study                   |
| pLKS27             | <i>csd5</i> in pLC292                           | This study                   |

## References for Supporting Information

1. Horton RM (1995) PCR-mediated recombination and mutagenesis. SOEing together tailor-made genes. *Mol Biotechnol* 3: 93-99.
2. Sycuro LK, Pincus Z, Gutierrez KD, Biboy J, Stern CA, et al. (2010) Peptidoglycan crosslinking relaxation promotes *Helicobacter pylori's* helical shape and stomach colonization. *Cell* 141: 822-833.
3. Terry K, Williams SM, Connolly L, Ottemann KM (2005) Chemotaxis plays multiple roles during *Helicobacter pylori* animal infection. *Infect Immun* 73: 803-811.
4. Humbert O, Salama NR (2008) The *Helicobacter pylori* HpyAXII restriction-modification system limits exogenous DNA uptake by targeting GTAC sites but shows asymmetric conservation of the DNA methyltransferase and restriction endonuclease components. *Nucleic Acids Res* 36: 6893-6906.
5. Campanella JJ, Bitincka L, Smalley J (2003) MatGAT: an application that generates similarity/identity matrices using protein or DNA sequences. *BMC Bioinformatics* 4: 29.
6. Tamura K, Peterson D, Peterson N, Stecher G, Nei M, et al. (2011) MEGA5: Molecular Evolutionary Genetics Analysis using Maximum Likelihood, Evolutionary Distance, and Maximum Parsimony Methods. *Mol Biol Evol*.
7. Solnick JV, O'Rourke JL, Vandamme P, Lee A (2006) The Genus *Helicobacter*. In: Martin (Editor-in Chief) D, Falkow S, Rosenberg E, Schleifer KH, Stackebrandt E, editors. *The Prokaryotes*. 3rd ed. New York: Springer. pp. 139-177.
8. Wassenaar TM, Newell DG (2006) The Genus *Campylobacter*. In: Martin (Editor-in Chief) D, Falkow S, Rosenberg E, Schleifer KH, Stackebrandt E, editors. *The Prokaryotes*. 3rd ed. New York: Springer. pp. 119-138.
9. Kuever J, Rainey FA, Widdel F (2005) Family I. *Desulfovibrionaceae* fam. nov. In: Brenner DJ, Krieg NR, Staley JT, Garrity GM, editors. *Bergey's Manual*. 2nd edn ed. New York: Springer. pp. 926.
10. Vandamme P, Dewhirst FE, Paster BJ, On SLW (2005) Genus I. *Campylobacter*. In: Garrity (Editor-in Chief) GM, Brenner DJ, Krieg NR, Staley JT, editors. *Bergey's Manual of Systematic Bacteriology* 2nd ed. New York: Springer. pp. 1147-1160.
11. Kiehlbauch JA, Brenner DJ, Nicholson MA, Baker CN, Patton CM, et al. (1991) *Campylobacter butzleri* sp. nov. isolated from humans and animals with diarrheal illness. *J Clin Microbiol* 29: 376-385.
12. Miller WG, Parker CT, Rubenfield M, Mendz GL, Wosten MM, et al. (2007) The complete genome sequence and analysis of the epsilonproteobacterium *Arcobacter butzleri*. *PLoS One* 2: e1358.
13. Pati A, Gronow S, Lapidus A, Copeland A, Glavina Del Rio T, et al. Complete genome sequence of *Arcobacter nitrofigilis* type strain (CI). *Stand Genomic Sci* 2: 300-308.
14. Gunther IV NW, Chen CY (2009) The biofilm forming potential of bacterial species in the genus *Campylobacter*. *Food Microbiol* 26: 44-51.
15. Lawson AJ, On SL, Logan JM, Stanley J (2001) *Campylobacter hominis* sp. nov., from the human gastrointestinal tract. *Int J Syst Evol Microbiol* 51: 651-660.
16. Campbell BJ, Jeanthon C, Kostka JE, Luther GW, 3rd, Cary SC (2001) Growth and phylogenetic properties of novel bacteria belonging to the epsilon subdivision of the Proteobacteria enriched from *Alvinella pompejana* and deep-sea hydrothermal vents. *Appl Environ Microbiol* 67: 4566-4572.

17. Kodama Y, Watanabe K (2004) *Sulfuricurvum kujiense* gen. nov., sp. nov., a facultatively anaerobic, chemolithoautotrophic, sulfur-oxidizing bacterium isolated from an underground crude-oil storage cavity. *Int J Syst Evol Microbiol* 54: 2297-2300.
18. Takai K, Suzuki M, Nakagawa S, Miyazaki M, Suzuki Y, et al. (2006) *Sulfurimonas paralvinellae* sp. nov., a novel mesophilic, hydrogen- and sulfur-oxidizing chemolithoautotroph within the Epsilonproteobacteria isolated from a deep-sea hydrothermal vent polychaete nest, reclassification of *Thiomicrospira denitrificans* as *Sulfurimonas denitrificans* comb. nov. and emended description of the genus *Sulfurimonas*. *Int J Syst Evol Microbiol* 56: 1725-1733.
19. Sikorski J, Lapidus A, Copeland A, Glavina Del Rio T, Nolan M, et al. (2010) Complete genome sequence of *Sulfurospirillum deleyianum* type strain (5175). *Stand Genomic Sci* 2: 149-157.
20. Baar C, Eppinger M, Raddatz G, Simon J, Lanz C, et al. (2003) Complete genome sequence and analysis of *Wolinella succinogenes*. *Proc Natl Acad Sci U S A* 100: 11690-11695.
21. Wolin MJ, Wolin EA, Jacobs NJ (1961) Cytochrome-producing anaerobic *Vibrio succinogenes*, sp. n. *J Bacteriol* 81: 911-917.
22. Kelley LA, Sternberg MJ (2009) Protein structure prediction on the Web: a case study using the Phyre server. *Nat Protoc* 4: 363-371.
23. Reverter D, Maskos K, Tan F, Skidgel RA, Bode W (2004) Crystal structure of human carboxypeptidase M, a membrane-bound enzyme that regulates peptide hormone activity. *J Mol Biol* 338: 257-269.
24. Makarova KS, Grishin NV (1999) The Zn-peptidase superfamily: functional convergence after evolutionary divergence. *J Mol Biol* 292: 11-17.
25. Glauner B (1988) Separation and quantification of mucopeptides with high-performance liquid chromatography. *Anal Biochem* 172: 451-464.
26. Covacci A, Censini S, Bugnoli M, Petracca R, Burroni D, et al. (1993) Molecular characterization of the 128-kDa immunodominant antigen of *Helicobacter pylori* associated with cytotoxicity and duodenal ulcer. *Proc Natl Acad Sci U S A* 90: 5791-5795.
27. Baldwin DN, Shepherd B, Kraemer P, Hall MK, Sycuro LK, et al. (2007) Identification of *Helicobacter pylori* genes that contribute to stomach colonization. *Infect Immun* 75: 1005-1016.
28. Lowenthal AC, Hill M, Sycuro LK, Mehmood K, Salama NR, et al. (2009) Functional Analysis of the *Helicobacter pylori* Flagellar Switch Proteins. *J Bacteriol* 191: 7147-7156.
